# Supplementary material
Source: PubMed Central journal article supplement (PMC4365973)
Supplement: NIHMS601948-supplement-01.pdf [file NIHMS601948-supplement-01.pdf]

## Supplemental Figures and Information

### Supplemental Figure Legends

#### Supplemental Figure 1-related to Figure 1

Bile duct ligation was performed on *WT* (*Shp2<sup>fl/fl</sup>*) animals, and sacrificed 1 month later. Liver sections were stained with Manson's trichrome, reticulin and CK-19 antibody.

#### Supplemental Figure 2-related to Figure 3

(A) Feces were collected for 72 hrs from single-housed *WT* and *Shp2<sup>hep-/-</sup>* animals. Feces were air-dried for 72 hrs and dry feces weight was adjusted to daily excretion per gram body weight.  
(B) BA compositions in BA pool, liver and feces were adjusted to body, liver and feces weight, respectively.

#### Supplemental Figure 3-related to Figure 5

(A) Cyp7a1 protein levels were determined by immunoblot analysis of whole liver lysates derived from *WT* and *Shp2<sup>hep-/-</sup>* mice with two other antibodies (Cyp7a1 #2 Abcam, Cyp7a1 #3 Cosmo Bio). The samples and loading amounts were the same as in Fig. 5b. Each lane represents an individual animal.  
(B-D) Band intensity of Cyp7a1 was calculated to loading control. The graph in (B) was from Figure 5B, (C) from Figure 5C and (D) from Figure 5F.  
(E) *WT* and *Shp2<sup>hep-/-</sup>* animals were fed either with vehicle or GW4064 dissolved in vehicle by oral gavage. The animals were fed at 6am and 6pm (US pacific time) for consecutive 10 days. After the last feeding (6 am), the animals were starved for 6 hours before sacrifice. RNAs from ileums and livers were isolated and assayed for qRT-PCR.

#### Supplemental Figure 4-related to Figure 6

(A) Shp2, Cyp7a1 and  $\beta$ -actin protein levels were determined by immunoblot analysis of whole liver and ileum lysates from *WT* and *Shp2<sup>hep-/-</sup>* mice. For direct comparison, the image from Fig. 5b was used here. Each lane represents an individual animal. Corresponding liver and ileum samples were collected from the same animals.

(B) Band intensity of Cyp7a1 in Figure 6C was calculated to loading control.

(C) Band intensity of indicated proteins in Figure 6D was calculated to loading control.

(D) Immunoblot analysis of liver lysates was performed with antibodies against pFRS2 $\alpha$ (Y196), pErk, Erk1, p-p90RSK, p-PKC (pan) ( $\beta$  II Ser660), pJNK, JNK, p-p38, p38,  $\beta$ -Klotho and GAPDH. Two-month-old *WT* or *Shp2*<sup>(H+K)/-</sup> mice were fasted for 5.5 hours before i.p. injection of PBS or hFGF19 (1 mg/kg body weight). The animals were sacrificed 30 min after injection.

(E) Band intensity of Cyp7a1 in Figure 6F was calculated to loading control.

### Supplemental Figure 5-related to Figure 7

(A) Heat maps of the K-means cluster analysis for gene expression changes in *Shp2*<sup>hep/-</sup>, *FXR*<sup>-/-</sup>/*SHP*<sup>-/-</sup> and FGF15/19-treated mice. The colors in heat maps represent log2 ratios of gene expression fold change, which were calculated as KO versus WT mice, and FGF15/19- versus PBS-treated mice, respectively. Yellow means up-regulation, black means no change, and blue means down-regulation of expression. The clusters are labeled with colored numbers.

(B) Bar chart representation of gene ontology of clustered genes. Each bar chart is labeled with colored numbers on the left that correspond to the clusters in heat maps. Bars represent -log10 of p values.

(C) Band intensities of FGFR4 in Figure 7G and 7H were calculated against loading control.

(D) Relative expression of *FGFR4* mRNA in *WT* or *Shp2*<sup>hep/-</sup> livers ( $n = 4-5$ ) as determined by qRT-PCR. Relative gene expression was normalized to  $\beta$ -actin. Fold change was calibrated to the *WT* group.

### Supplemental Table 1 List of primers

|          |                        |                       |
|----------|------------------------|-----------------------|
| Shp2-F   | TCCATGGTCACTTGTCTG GA  | (Zhu et al., 2011)    |
| Shp2-R   | GACGTGGGTCACTTTGGACT   | (Zhu et al., 2011)    |
| FXR-F    | GCTTGATGTGCTACAAAAGCTG | PrimerBank 6677831a1  |
| FXR-R    | CGTGGTGATGGTTGAATGTCC  | PrimerBank 6677831a1  |
| SHP-F    | CTCATGGCCTCTACCCTCAA   | (He et al., 2011)     |
| SHP-R    | GGTCACCTCAGCAAAAAGCA T | (He et al., 2011)     |
| Cyp7a1-F | GGGATTGCTGTGGTAGTGAGC  | PrimerBank 31542445a1 |
| Cyp7a1-R | GGTATGGAATCAACCCGTTGTC | PrimerBank 31542445a1 |
| Cyp7b1-F | GGAGCCACGACCCTAGATG    | PrimerBank 6681127a1  |

|                  |                             |                       |
|------------------|-----------------------------|-----------------------|
| Cyp7b1-R         | TGCCAAGATAAGGAAGCCAAC       | PrimerBank 6681127a1  |
| Cyp27a1-F        | CCTCACCTATGGGATCTTCATC      | This study            |
| Cyp27a1-R        | TTTAAGGCATCCGTGTAGAGC       | This study            |
| Cyp8b1-F         | CCTCTGGACAAGGGTTTTGTG       | PrimerBank 31981808a1 |
| Cyp8b1-R         | GCACCGTGAAGACATCCCC         | PrimerBank 31981808a1 |
| Cyp3a11-F        | TGAATATGAAACTTGCTCTCACTAAAA | This study            |
| Cyp3a11-R        | CCTTGTCTGCTTAATTTTCAGAGGT   | This study            |
| Cyp17a1-F        | GCCCAAGTCAAAGACACCTAAT      | PrimerBank 6681097a1  |
| Cyp17a1-R        | GTACCCAGGCGAAGAGAATAGA      | PrimerBank 6681097a1  |
| FGF15-F          | ATGGCGAGAAAGTGGAACGG        | PrimerBank 6679777a1  |
| FGF15-R          | CTGACACAGACTGGGATTGCT       | PrimerBank 6679777a1  |
| FGFR4-F          | GGCTGTATTCCCCTCCATCG        | PrimerBank 6671509a1  |
| FGFR4-R          | CCAGTTGGTAACAATGCCATGT      | PrimerBank 6671509a1  |
| HMGCR-F          | GGCTGTATTCCCCTCCATCG        | PrimerBank 6671509a1  |
| HMGCR-R          | CCAGTTGGTAACAATGCCATGT      | PrimerBank 6671509a1  |
| Acat2-F          | GGCTGTATTCCCCTCCATCG        | PrimerBank 6671509a1  |
| Acat2-R          | CCAGTTGGTAACAATGCCATGT      | PrimerBank 6671509a1  |
| $\beta$ -actin-F | GGCTGTATTCCCCTCCATCG        | PrimerBank 6671509a1  |
| $\beta$ -actin-R | CCAGTTGGTAACAATGCCATGT      | PrimerBank 6671509a1  |

## Supplemental Table 2 List of antibodies

| Antibody name         | Vendor         | Cat#           | Dilution |
|-----------------------|----------------|----------------|----------|
| Mouse anti-Cyp7a1     | Cosmo Bio      | CAC-ABN-M01-CY | 1:500    |
| Goat anti-Cyp7a1      | Santa Cruz     | sc-14426       | 1:300    |
| Rabbit anti-Cyp7a1    | abcam          | ab65596        | 1:500    |
| pErk                  | Cell Signaling | 4370           | 1:1000   |
| pFRS2 $\alpha$ (Y196) | Cell Signaling | 3864           | 1:1000   |
| Lamin B1              | Cell Signaling | 9087           | 1:1000   |
| p38                   | Cell Signaling | 9212           | 1:1000   |
| p-p38                 | Cell Signaling | 9216           | 1:1000   |

|                                            |                                  |                     |                                              |
|--------------------------------------------|----------------------------------|---------------------|----------------------------------------------|
| FGFR4(c16)                                 | Santa Cruz                       | sc-124              | 1:1000 (mouse liver lysate WB)               |
| FGFR4                                      | Cell Signaling                   | 8562                | WB: 1:1000<br>IP: 1:200<br>Human cell lysate |
| GADPH                                      | GeneTex                          | GTX627408           | 1:1000                                       |
| $\beta$ -actin                             | Sigma-Aldrich                    | A5316               | 1:5000                                       |
| Rabbit anti-Shp2                           | Home-made                        | (Shi et al., 2000)  | WB: 1:10,000<br>IP: 1:1000                   |
| Rabbit anti-Erk                            | Home-made                        | (Shi et al., 2000)  | 1:2000                                       |
| Mouse anti-v5                              | Invitrogen                       | R960-25             | 1:5000                                       |
| Rabbit anti-FRS                            | Kind gift from Dr. Zhengjun Chen | (Zhou et al., 2009) | WB: 1:5000<br>IP: 1:500                      |
| Phospho-PKC(pan)( $\beta$ II Ser660)       | Cell Signaling                   | 9371                | 1:1000                                       |
| Phospho-p90RSK (Thr359/Ser363)             | Cell Signaling                   | 9344                | 1:1000                                       |
| Anti-Phosphotyrosine Antibody, clone 4G10® | Millipore                        | 05-321              | 1:5000                                       |
| Anti-Phosphotyrosine antibody [PY20]       | Abcam                            | ab10321             | 1:5000                                       |
| p-Tyr Antibody (PY99)                      | Santa Cruz                       | sc-7020             | 1:5000                                       |
| Anti-Phosphoserine, clone 4A4              | Millipore                        | 05-1000             | 1:5000                                       |

**Supplemental Table 3 Primer for Adenovirus generation and purification**

|           |                        |
|-----------|------------------------|
| VP16-ad-F | CACCATGGCCCCC          |
| VP16-ad-R | CCCACCGTACTCGTCATT     |
| FXR-ad-R  | CTGCACATCCCAGATCTCA    |
| mSHP-ad-F | CACCATGAGCTCCGGCCAGTCA |
| mSHP-ad-R | CCTCAGCAAAAGCATGTCTTC  |

## **References**

- He, J., Nishida, S., Xu, M., Makishima, M., and Xie, W. (2011). PXR prevents cholesterol gallstone disease by regulating biosynthesis and transport of bile salts. *Gastroenterology* *140*, 2095-2106.
- Shi, Z.Q., Yu, D.H., Park, M., Marshall, M., and Feng, G.S. (2000). Molecular mechanism for the Shp-2 tyrosine phosphatase function in promoting growth factor stimulation of Erk activity. *Mol Cell Biol* *20*, 1526-1536.
- Zhou, W.C., Feng, X.J., Wu, Y.J., Bengel, J., Zhang, Z., and Chen, Z.J. (2009). FGF-receptor substrate 2 functions as a molecular sensor integrating external regulatory signals into the FGF pathway. *Cell Res* *19*, 1165-1177.
- Zhu, H.H., Ji, K., Alderson, N., He, Z., Li, S., Liu, W., Zhang, D.E., Li, L., and Feng, G.S. (2011). Kit-Shp2-Kit signaling acts to maintain a functional hematopoietic stem and progenitor cell pool. *Blood* *117*, 5350-5361.
