# Supplementary material
Source: PubMed Central journal article supplement (PMC4365973)

BDL 1M

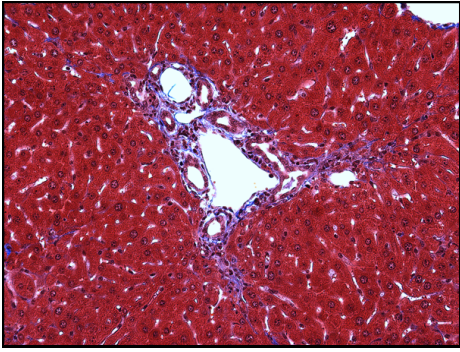

Trichrome

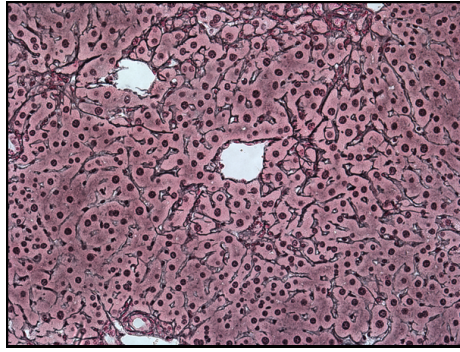

Reticulin

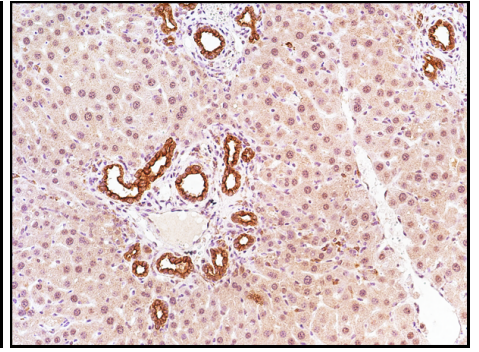

CK-19

A

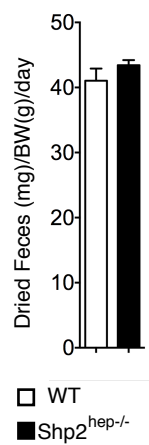

B

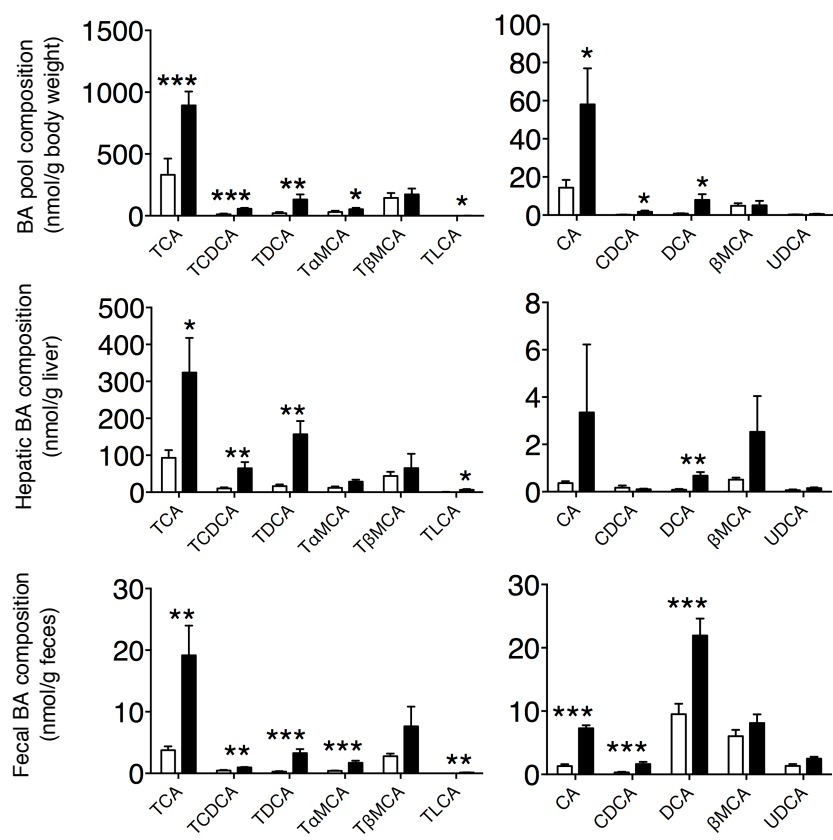

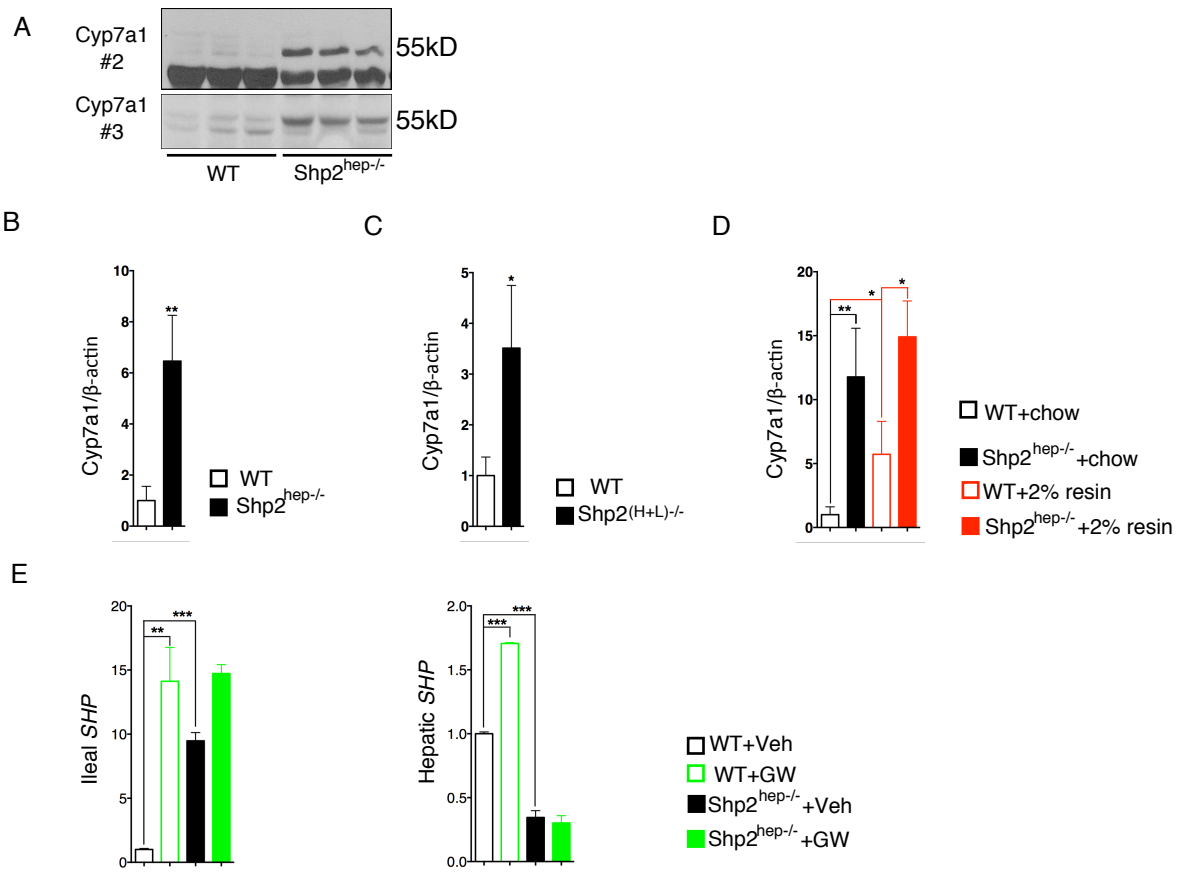

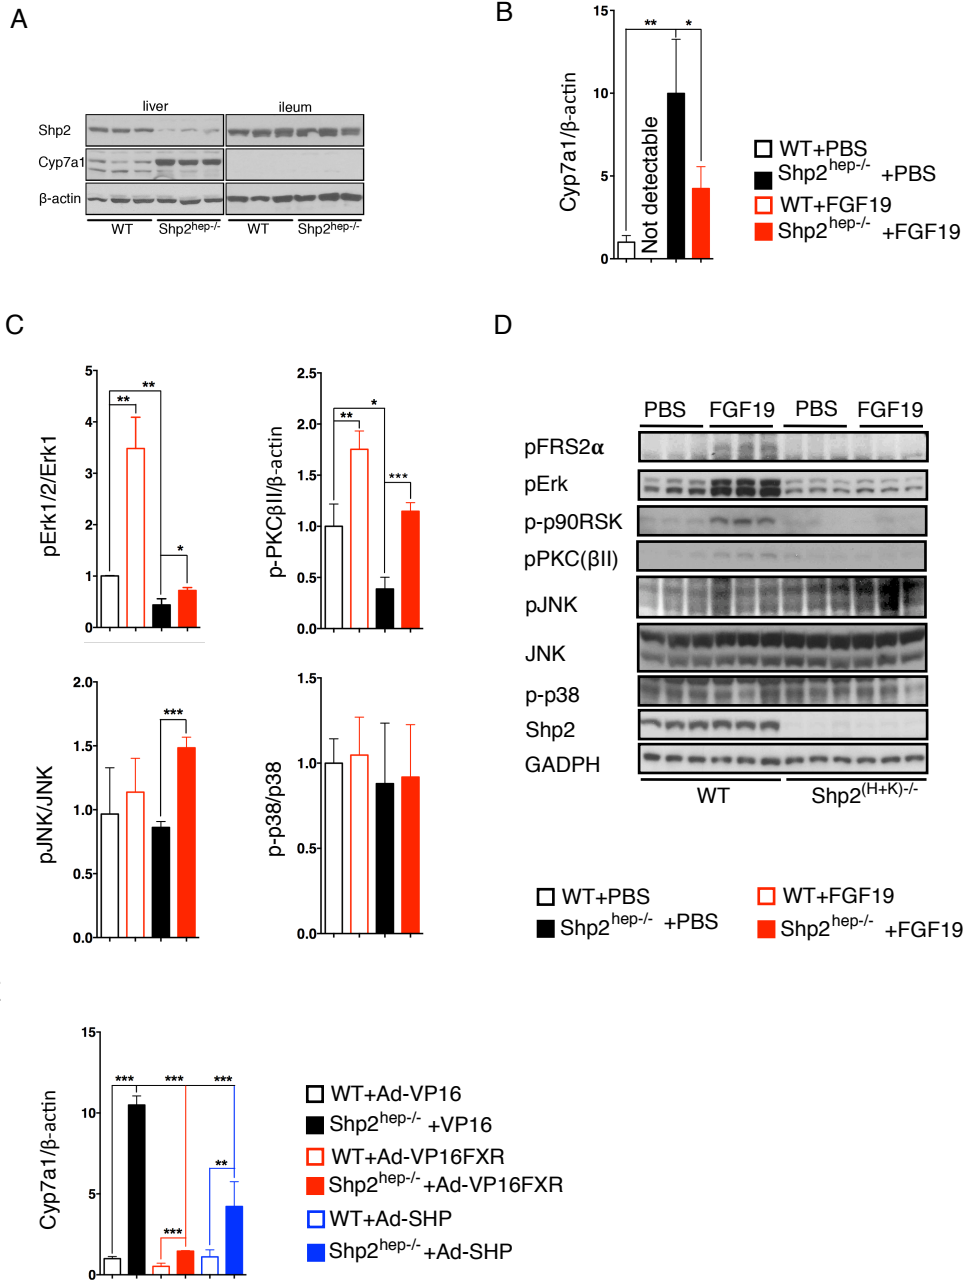

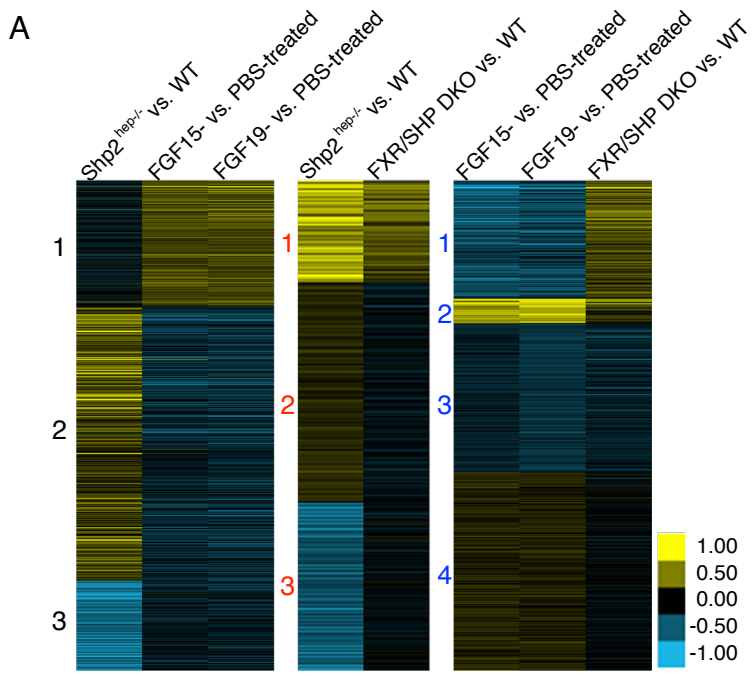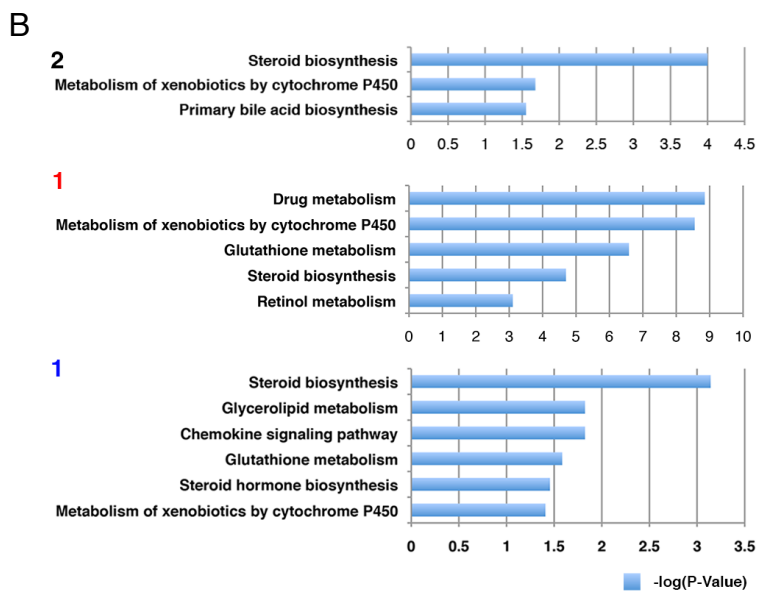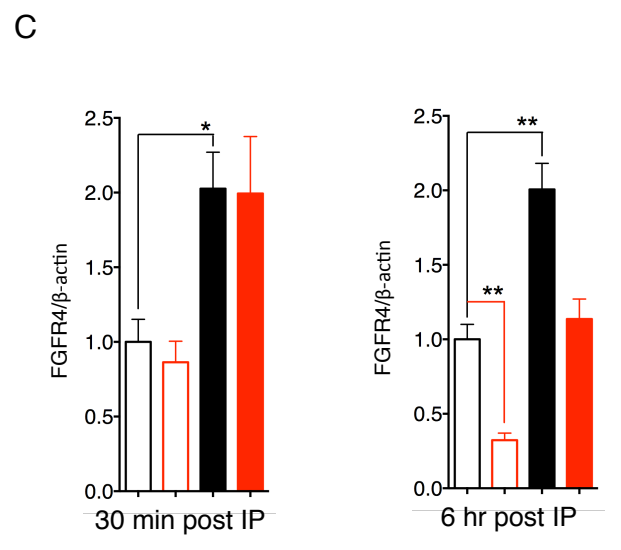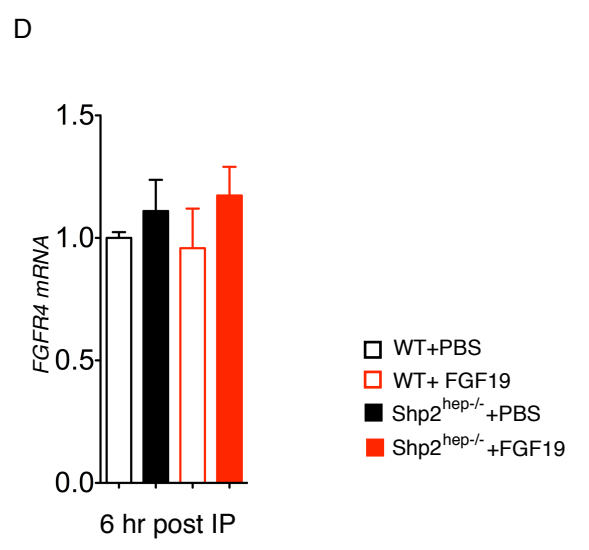

Supplement: NIHMS601948-supplement-02.pdf [file NIHMS601948-supplement-02.pdf]
